# Supplementary material
Source: Springer Nature journal article supplement (https://www.springermedizin.de/resource/supplementary/12883_2004_38_MOESM3_ESM.pdf/9456720)

Reported improvement (as % of patients)

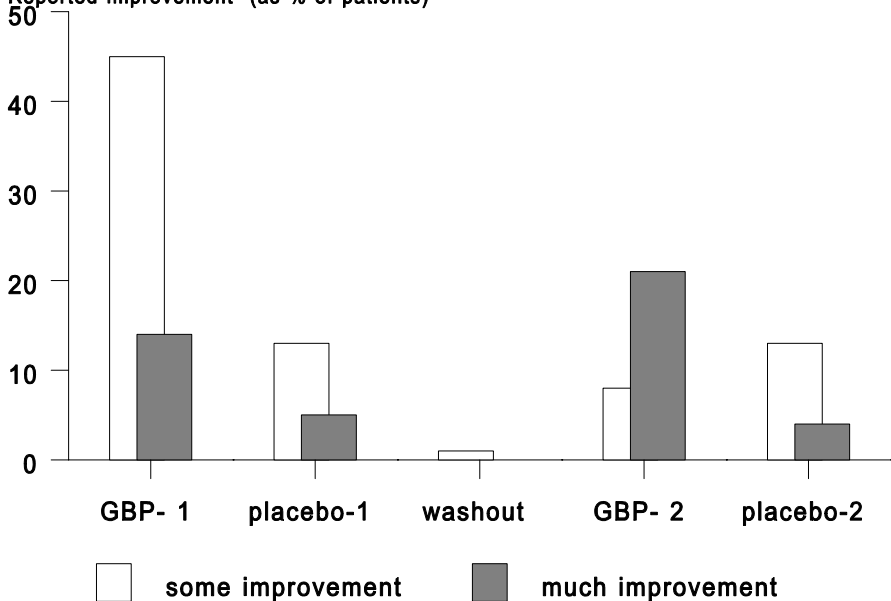

Supplement: MOESM3 [file 9456720]
